# Supplementary material
Source: publisher site journal article supplement (https://www.dovepress.com/article/214020)
Supplement: Supplementary file 1 [file get_supplementary_file.php]

**Supplementary Table 1.** Imaging parameters for T2-weighted image and ADC map

| Sequence parameter | Magnetom Skyra Siemens |
| --- | --- |
| T2-weighted |  |
| TR (ms) | 3000-6550 |
| TE (ms) | 97-101 |
| Slice thickness (mm) | 3 |
| Slice spacing (mm) | 3.6 |
| Flip angle | 150 |
| Matrix | 256×256 or 320×320 |
| ADC map |  |
| TR (ms) | 4600-7600 |
| TE (ms) | 60-87 |
| Slice thickness (mm) | 3.5 |
| Slice spacing (mm) | 3.5 |
| Flip angle | 90, 180 |
| Matrix | 140x126 or 140x140 |
| b value (s/mm2) | 800 |

Abbreviations: TR, repetition time; TE, echo time; ADC, apparent diffusion coefficient.

**Supplementary Figure 1**. Typically radiomic features selected by machine learning automatically.


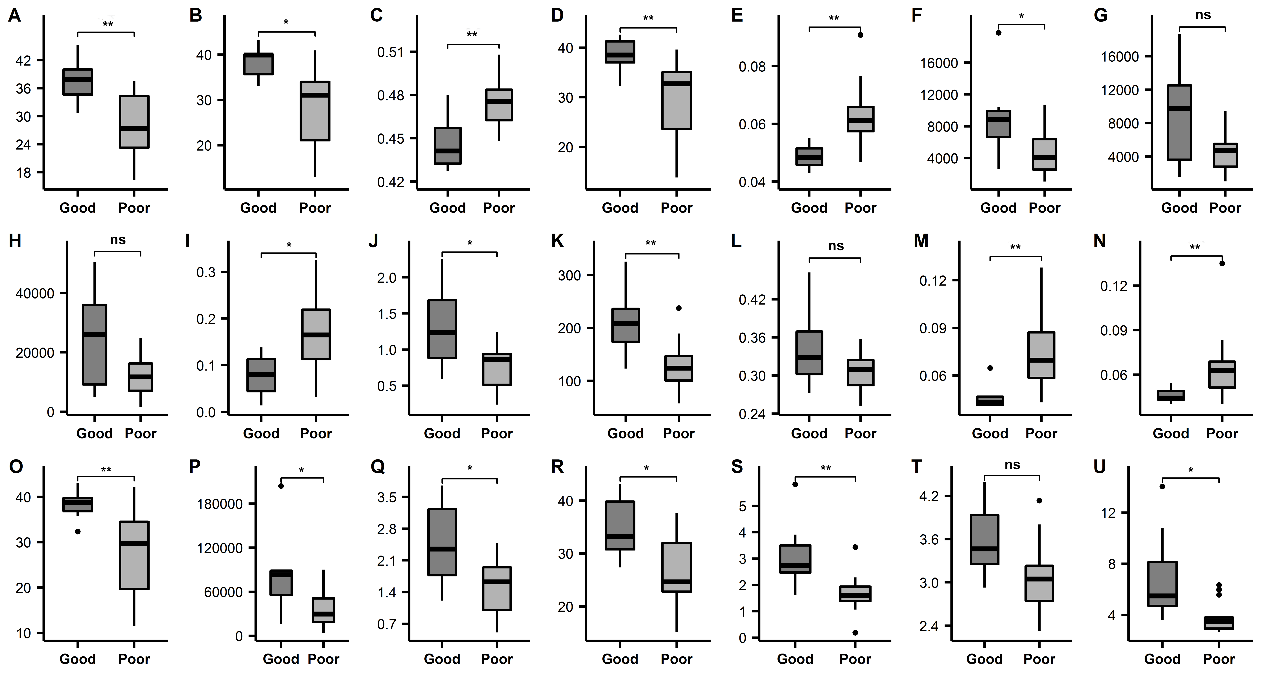


Radiomic feature values were compared between good and poor treatment response group using the using the Wilcoxon test. **p*≤0.05, ***p*≤0.01, ns indicates *p*>0.05. bin, alpha, maxd, and wN were parameters set for feature calculation. bin, BinWidth. alpha: GLDM_a. maxd: Maxdistances. wN, weightingNorm.

**A:** logarithm-gldm-DependenceVariance-bin-16-alpha-1-ADC.

**B:** LoG-sigma-2.5-gldm-DependenceVariance-bin-8-alpha-2-ADC.

**C:** wavelet-LHL-glcm-InverseVariance-bin-32-maxd-2-wN-euclidean-smtc-True-T2w.

**D:** LoG-sigma-2.5-gldm-DependenceVariance-bin-16-alpha-1-ADC.

**E:** logarithm-gldm-DependenceNonUniformityNormalized-bin-8-alpha-2-ADC.

**F:** wavelet-HHL-gldm-LargeDependenceHighGrayLevelEmphasis-bin-16-alpha-1-ADC.

**G:** wavelet-LHH-gldm-LargeDependenceHighGrayLevelEmphasis-bin-16-alpha-1-ADC.

**H:** wavelet-LHH-gldm-LargeDependenceHighGrayLevelEmphasis-bin-8-alpha-2-ADC.

**I:** wavelet-LHL-glcm-Correlation-bin-4-maxd-1-wN-no-weighting-smtc-True-ADC.

**J:** wavelet-HLH-gldm-LargeDependenceLowGrayLevelEmphasis-bin-8-alpha-1-T2w.

**K:** wavelet-LHL-firstorder-Range-ADC.

**L:** wavelet-HHL-glszm-SizeZoneNonUniformityNormalized-bin-16-T2w.

**M:** square-gldm-DependenceNonUniformityNormalized-bin-32-alpha-0-ADC.

**N:** square-gldm-DependenceNonUniformityNormalized-bin-4-alpha-3-ADC.

**O:** LoG-sigma-2.5-gldm-DependenceVariance-bin-4-alpha-4-ADC.

**P:** wavelet-HHL-gldm-LargeDependenceHighGrayLevelEmphasis-bin-4-alpha-4-ADC.

**Q:** wavelet-HLH-gldm-LargeDependenceLowGrayLevelEmphasis-bin-8-alpha-2-T2w.

**R:** logarithm-gldm-DependenceVariance-bin-8-alpha-2-ADC.

**S:** wavelet-LHL-glszm-GrayLevelVariance-bin-32-ADC.

**T:** wavelet-HLL-firstorder-Kurtosis-ADC.

**U:** wavelet-LHL-firstorder-Kurtosis-ADC.
